# Supplementary material for: Inactive X chromosome-specific reduction in placental DNA methylation
Source: PubMed Central journal article supplement — Hum Mol Genet. 2009 Jul 7;18(19):3544–52. doi: 10.1093/hmg/ddp299 (PMC2742397; doi:10.1093/hmg/ddp299), 2009-07-07
Supplement: ddp299_1.pdf [file ddp299_1.pdf]

Supplementary Figure 1: Effect of distance from transcription start site on methylation. Beta-values for female blood (white diamond), female placenta (white square), male blood (black triangle) and male placenta (black circle) versus distance from the TSS for each X-linked assay present on Illumina GoldenGate panel. The average beta-value for each sex and tissue is shown as a dashed horizontal line for females and a solid horizontal line for males. Black vertical line marks the TSS (0 bp) and the grey area contains the promoter region as defined by Weber *et al.* (700 bp upstream to 200 bp downstream of the TSS) (10). Assays were separated based on the CpG density (HC, IC and LC) of the 500 bp around each assay with MeXiP being observed in HC and IC in both blood (upper panels) and placenta (lower panels).

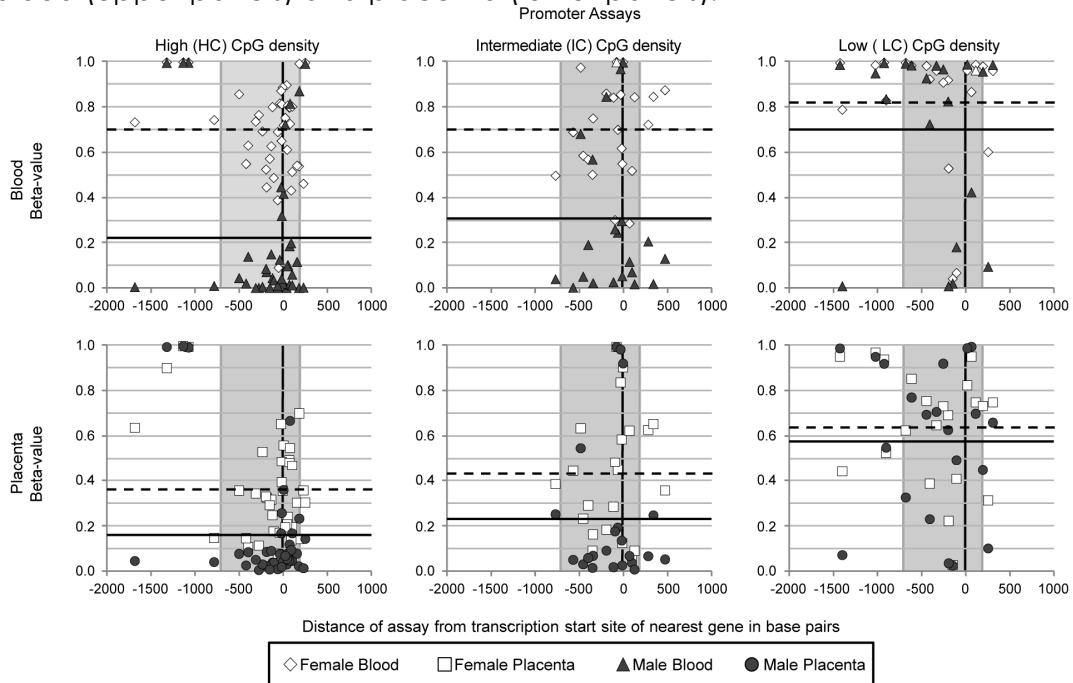

Supplementary Figure 2: Heatmap illustrating the percent methylation as determined by pyrosequencing at all 145 sites examined in the 31 pyrosequencing assays in 6 female blood, 6 female placentas (2 sites each), 6 male blood and 6 male placenta (2 sites each). DNA methylation levels represented as a gradient from blue (high methylation) to yellow (low methylation). Specific samples which failed for a particular assay were replaced with another sample and are marked in red with the replacement sample listed at the end of the figure.

Submitted as separate Excel file "Cotton Sup Fig 2.xls"

Supplementary Figure 3: The Xi shows less placental methylation compared with blood than the Xa at the majority of regions examined across the X chromosome. Percent methylation change from blood to placenta for Xa (white) and Xi (black) at 30 pyrosequencing assays. Negative percent change methylation indicates that blood is more methylated than placenta while positive shows that placenta is more methylated than blood. Assays are separated into CpG density classes, HC, IC and LC, by vertical lines. (A) promoter assays (B) intragenic assays (C) intergenic assays. Xa value is the level of methylation observed in male, Xi value is calculated by subtracting the Xa from the female methylation level multiplied by two.

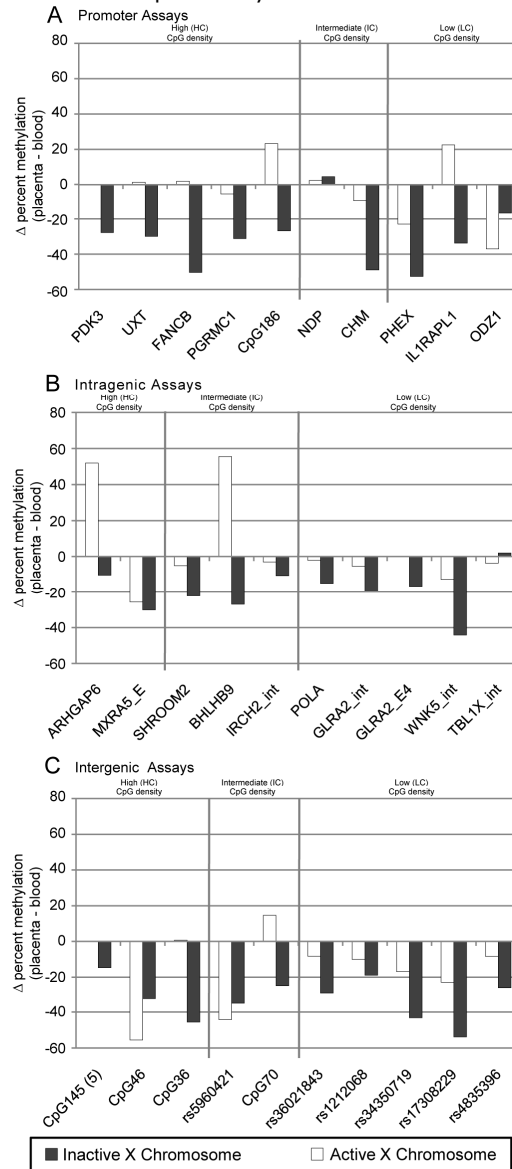

Supplementary Figure 4: The Xi shows less placental methylation compared with blood than the Xa at the majority of promoters examined on the X chromosome. Beta-value methylation change from blood to placenta for Xa (white) and Xi (black) at Illumina GoldenGate panel assays. Negative percent change methylation indicates that blood is more methylated than placenta while positive shows that placenta is more methylated than blood. Assays are separated into CpG density classes, HC, IC and LC, by vertical lines. (A) promoter assays (B) intragenic assays (C) intergenic assays. Xa value is the level of methylation observed in male, Xi value is calculated by subtracting the Xa from the female methylation level multiplied by two.

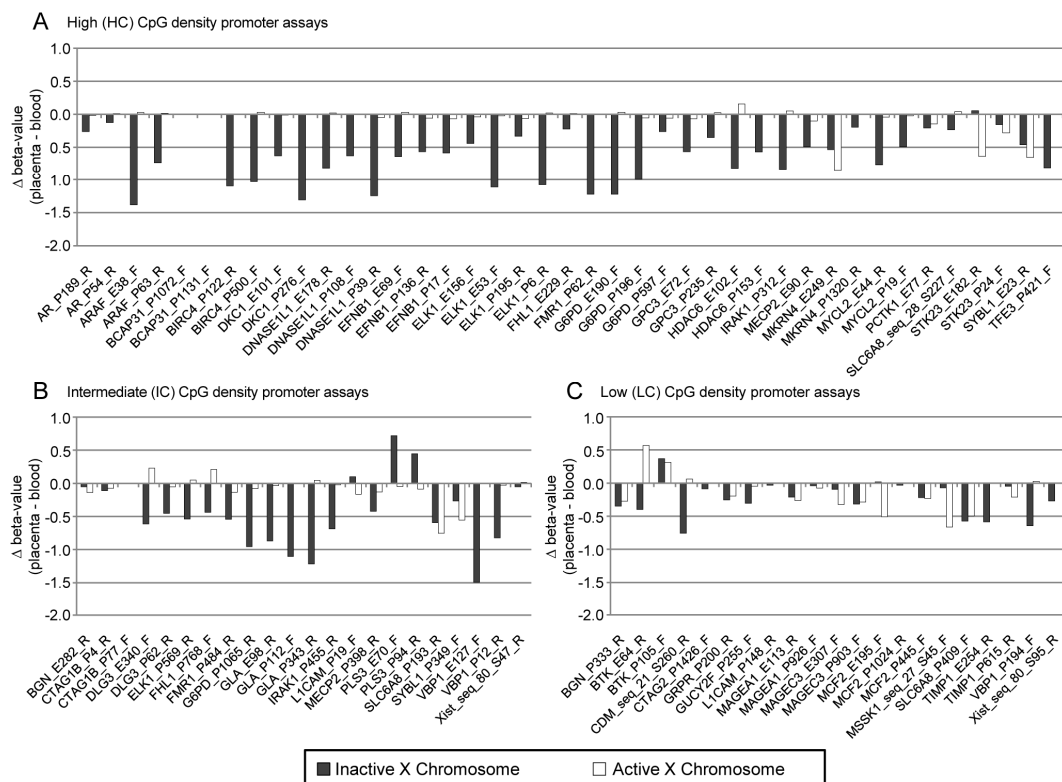

Supplementary Table 1: Primer sequences and cycling conditions used in pyrosequencing assays. PCR product size, assay class and CpG class of each assay also listed.

| Name <sup>a</sup>                              | Sequence (5' to 3')                                                                          | Annealing Temperature | PCR product size | Assay Class | CpG class |
|------------------------------------------------|----------------------------------------------------------------------------------------------|-----------------------|------------------|-------------|-----------|
| PDK3_78_F1<br>PDK3_78_R1_B<br>PDK3_78_S1       | GGTTGTA AAAATTAAGTGTAGGA<br>/Biotin/AACCCAACCCAACAATACAA<br>AAAATTAAGTGTAGGATG               | 57°C                  | 211              | Promoter    | HC        |
| UXT_89_F1<br>UXT_89_R1B<br>UXT_89_S1           | GTTAATGGGGGATTGTA AAAAG<br>/Biotin/TCACTTCCTCTACCTCCACCTAT<br>ATGGGGGATTGTA AAAA             | 57°C                  | 130              | Promoter    | HC        |
| FANCB_93_F1B<br>FANCB_93_R1<br>FANCB_93_S1     | /Biotin/TTTGGGGAGTGTGTGAAAGTA<br>AACCAAACCCTCAACCTAAATC<br>CCTCAACCTAAATCCCAT                | 57°C                  | 167              | Promoter    | HC        |
| PGRMC1_95_F1<br>PGRMC1_95_R1_B<br>PGRMC1_95_S1 | GGGGAAGGGTTATTAAGGAGAG<br>/Biotin/CCCATTCTAAAACCCCTCATCT<br>GGGAAGGGTTATTAAGGA               | 57°C                  | 164              | Promoter    | HC        |
| CpG186_89_F1_B<br>CpG186_89_R1<br>CpG186_89_S1 | /Biotin/TGTAGTTTGGATATTTTGATGGG<br>AACCAATCCTACCTTACAACCT<br>TCCTACCTTACAACCTTT              | 57°C                  | 220              | Promoter    | HC        |
| NDP_F1<br>NDP_R1<br>NDP_S1                     | AGAGAGAGAATGTAAATGGAAAAGTGTA<br>/Biotin/ATTAACCTCTTATAATCCATAATACCA<br>AGAGAATGTAAATGGAAA    | 57°C                  | 255              | Promoter    | IC        |
| CHM_F1<br>CHM_R1<br>CHM_S1                     | GTGGGAGATTTGGATATTTTTGAT<br>/Biotin/AAATAAAAATCTCCTTATTCACAAAAC<br>GATAATATTGAAGTAAAATTGTTAG | 57°C                  | 111              | Promoter    | IC        |
| PHEX_F1<br>PHEX_R1<br>PHEX_S1                  | AGTTTTTAAAGTGTGGGATTATAGG<br>/Biotin/ACTTCAACAAATCCCCAAAATAAA<br>AAAGTGTGGGATTATAGG          | 57°C                  | 93               | Promoter    | LC        |

|                                              |                                                                                                   |        |     |             |    |
|----------------------------------------------|---------------------------------------------------------------------------------------------------|--------|-----|-------------|----|
| II1RAPL1_F1<br>II1RAPL1_R1<br>II1RAPL1_S1    | /Biotin/TTGGGGAGATAGTGATGGG<br>CACACTCTTAATAACCTCCTTTTCATC<br>ATCTCTTCTCTTTAAAACAAAT              | 55°C   | 91  | Promoter    | LC |
| ODZ1_F1<br>ODZ1_R1<br>ODZ1_S1                | GTATTAAGGATTAAGTTGGAGGTTGTAGT<br>/Biotin/TTATACTCCTCACCCTTTCAAATCTAAT<br>ATAGTTTTTAAAAATATTGTATTG | 57°C   | 193 | Promoter    | LC |
| ARHGAP6_F1<br>ARHGAP6_R41<br>ARHGAP6_S1      | /Biotin/ATTTGATTGAAGGTTGAATGAG<br>CCAACCCTAAATTCAATATTCTT<br>CAATATTCTTTACCCCA                    | 64.5°C | 149 | Within Gene | HC |
| MXA5_E_F1<br>MXA5_E_R1<br>MXA5_E_S1          | TTTTTTGATGGAAAGGGTT<br>/Biotin/TCTTCCCTAACAAAAAATATAACAAACT<br>TTTTTTGATGGAAAGG                   | 57°C   | 90  | Within Gene | HC |
| ShROOM2_F1<br>SHROOM2_R1<br>SHROOM2_S1       | GGTGGAGAATGTTTTAATAATTG<br>/Biotin/CCCCCATTCCAAATCAA<br>GGTGGAGAATGTTTTA                          | 53°C   | 86  | Within Gene | IC |
| BHLHB9_F2<br>BHLHB9_R2<br>BHLHB9_S2          | /Biotin/GGGGTTTTTTGAGGTAGTTGGTGT<br>CCCCTCTCAAACCCACCTTAAT<br>TCTCAAACCCACCTTAAT                  | 57°C   | 102 | Within Gene | IC |
| IRCH2_int_F1<br>IRCH2_int_R1<br>IRCH2_int_S1 | GAGTAGGAGGTTATTATGAGGAGAA<br>/Biotin/ACTAAACTACTATAACCCCCACTATAAAT<br>GGAGGTTATTATGAGGAGA         | 57°C   | 101 | Within Gene | IC |
| POLA_F3<br>POLA_R2                           | /Biotin/GGGGGGTAGTGTTTTATGTATATTAAT<br>ACCACATAAAACCCACACATATAAT                                  | 57°C   | 115 | Within Gene | LC |

|                |                                        |      |     |               |    |
|----------------|----------------------------------------|------|-----|---------------|----|
| POLA_S5        | ATAAACTAACTTTTCCTATC                   |      |     |               |    |
| GLRA2_Int_F3   | /Biotin/GAATTTTTGATGGATTGGATATGG       |      |     |               |    |
| GLRA2_Int_R4   | CCTTCTATTA ACTCCACACTCCTATATCA         | 57°C | 183 | Within Gene   | LC |
| GLRA2_Int_S2   | ATCTCATAACTATCTACATTAACC               |      |     |               |    |
| GLRA2_E4_F3    | TGTAAATAGAATTTTTGTGTTAGGGTAAT          |      |     |               |    |
| GLRA2_E4_R1    | /Biotin/ATAGAATTTTTGTGTTAGGG           | 57°C | 135 | Within Gene   | LC |
| GLRA2_E4_S3    | ATAGAATTTTTGTGTTAGGG                   |      |     |               |    |
| WNK5_Int_F1    | /Biotin/TAAAAATTAGTTGGGAGTGGTGGTAGG    |      |     |               |    |
| WNK5_Int_R1    | CTCATTTACATTTTCCTCCCTCATCA             | 57°C | 217 | Within Gene   | LC |
| WNK5_Int_S1    | CCAAATTAATAACAATAACACA                 |      |     |               |    |
| TBL1X_int_F1   | TGTGTTAAGTTTGATTGTAGAAATGAAT           |      |     |               |    |
| TBL1X_int_R1   | /Biotin/CCCTAAATAATAATCTCAATTTTCCTCATA | 55°C | 147 | Within Gene   | LC |
| TBL1X_int_S1   | GTAGAAATGAATTTGAAGAAG                  |      |     |               |    |
| CpG145_89_F1   | TTGGATTTGTTTGTAGGATTG                  |      |     |               |    |
| CpG145_89_R1_B | /Biotin/CAAACCCA ACTCAATAACCT          | 57°C | 182 | Between Genes | HC |
| CpG145_89_S1   | GGATTTGTTTGTAGGAT                      |      |     |               |    |
| CpG46_F1       | /Biotin/GGTTTTAGTGGTTTTGATTTATAGAGT    |      |     |               |    |
| CpG46_R1       | CTCCTCTACTAAAAACAACCTACC               | 57°C | 108 | Between Genes | HC |
| CpG46_S1       | TCCTCTACTAAAAACAACCT                   |      |     |               |    |
| CpG36_F1       | GGAAAGGAAAAGGGAGAATT                   |      |     |               |    |
| CpG36_R20      | /Biotin/CCCTCACC ACTAAACAATTAA         | 57°C | 80  | Between Genes | HC |
| CpG36_S18      | GGAAAGGAAAAGGGAGAATT                   |      |     |               |    |

|                |                                       |        |     |               |    |
|----------------|---------------------------------------|--------|-----|---------------|----|
| rs5960421_1_F1 | GGTTGTAGAGTGTGGTAGAGG                 | 57°C   | 143 | Between Genes | IC |
| rs5960421_1_R1 | /Biotin/CCCTCCCACCAAATCAAAT           |        |     |               |    |
| rs5960421_1_S1 | AGTGTGGTAGAGGTGTT                     |        |     |               |    |
| CpG70_F1       | GTTGAAGTAGGAGGTTGGATGTA               | 55°C   | 169 | Between Genes | IC |
| CpG70_R1       | /Biotin/CTAAACTCCTATTCTCCAATTATAACAAC |        |     |               |    |
| CpG70_S1       | GAAGTAGGAGGTTGGAT                     |        |     |               |    |
| rs36021843_F1  | /Biotin/ATGGTTGGTTATATGGTTATTAGAGTT   | 57°C   | 185 | Between Genes | LC |
| rs36021843_R1  | CCCTAAAAAATAACCTCCTACTTAACTAT         |        |     |               |    |
| rs36021843_S1  | AATAATATTCCACCTCCC                    |        |     |               |    |
| rs1212068_1_F1 | /Biotin/TGAGAGATGAGTGTTATGGAGAAA      | 64.5°C | 183 | Between Genes | LC |
| rs1212068_1_R1 | CAAAAACAAACTCTCCAAATTCA               |        |     |               |    |
| rs1212068_1_S1 | TCTCCAAATTCAAATCAAT                   |        |     |               |    |
| rs34350719_F1  | GTTTTGGGTTGGAAAAATTAGAGT              | 57°C   | 79  | Between Genes | LC |
| rs34350719_R1  | /Biotin/CCCATAAAATTCAAAAAACTTCTACCT   |        |     |               |    |
| rs34350719_S1  | TGGGTTTGGAAAAATTAG                    |        |     |               |    |
| rs17308229_F1  | GGTTTTTTATTTTTGAGATTGTTAG             | 64°C   | 214 | Between Genes | LC |
| rs17308229_R1  | /Biotin/AACCACTCAAATCTACAAACAATA      |        |     |               |    |
| rs17308229_S1  | TATTATAAGTTATTGTATTAGGG               |        |     |               |    |
| rs4825396_F1   | /Biotin/TTTTTGATGGGGGAGAAGGGT         | 57°C   | 113 | Between Genes | LC |
| rs4825396_R1   | CCCATCCTAATCTCCTATTTCTTATCC           |        |     |               |    |
| rs4825396_S1   | TCCTATTTCTTATCCACA                    |        |     |               |    |

a) F: Forward primers, R: Reverse primer, S: Sequencing primers



Supplementary Table 2: Methylation assays for island (HC and IC) promoters failing to show MeXiP or containing features believed to interfere with MeXiP or showing discordant methylation results.

| Assay name     | Average Methylation |                 |            |               | Features interfering with MeXiP <sup>a</sup> |                                 |                        |                                   | Discordant Assay Methylation Patterns <sup>d</sup> | Previous methylation data <sup>e</sup> | Evaluation                                                                                         |
|----------------|---------------------|-----------------|------------|---------------|----------------------------------------------|---------------------------------|------------------------|-----------------------------------|----------------------------------------------------|----------------------------------------|----------------------------------------------------------------------------------------------------|
|                | Female Blood        | Female Placenta | Male Blood | Male Placenta | CpG Density                                  | Repetitive Element <sup>b</sup> | Escapes X inactivation | Distance to TSS (bp) <sup>c</sup> |                                                    |                                        |                                                                                                    |
| AR_P54_R       | 0.0<br>9            | 0.0<br>4        | 0.0<br>0   | 0.0<br>1      | HC                                           | -                               | 0/6                    | -54                               | Yes                                                | (1)                                    | The 2 Illumina assays for AR are discordant and P189 does not match previous methylation results.  |
| AR_P189_R      | 0.4<br>5            | 0.3<br>3        | 0.0<br>7   | 0.1<br>0      | HC                                           | -                               | 0/6                    | -189                              |                                                    |                                        |                                                                                                    |
| BCAP31_P1072_F | 0.9<br>9            | 0.9<br>9        | 0.9<br>9   | 0.9<br>9      | HC                                           | -                               | 3/9                    | -1074                             | -                                                  | (2)                                    | Also near a duplication on chr 16 <sup>f</sup> .                                                   |
| BCAP31_P1131_F | 0.9<br>9            | 0.9<br>9        | 0.9<br>9   | 0.9<br>9      | HC                                           | -                               | 3/9                    | -1133                             |                                                    |                                        |                                                                                                    |
| BGN_E282_R     | 0.7<br>2            | 0.5<br>9        | 0.2<br>0   | 0.1<br>3      | IC                                           | -                               | 0/5                    | 282                               | Yes                                                | -                                      | The 2 Illumina assays for BGN are discordant however the other assay is an LC.                     |
| CTAG1B_P4_R    | 1.0<br>0            | 0.9<br>0        | 0.9<br>9   | 0.9<br>2      | IC                                           | -                               | -                      | -4                                | -                                                  | (3,4)                                  | CT gene family highly methylated, additionally many other CTs on the array were LCs <sup>g</sup> . |
| CTAG1B_P77_F   | 1.0<br>0            | 0.9<br>9        | 1.0<br>0   | 0.9<br>9      | IC                                           | -                               | -                      | -77                               |                                                    |                                        |                                                                                                    |
| DLG3_E340_F    | 0.8<br>4            | 0.6<br>7        | 0.0<br>2   | 0.2<br>7      | IC                                           | -                               | -                      | 340                               | -                                                  | -                                      | Shows MeXiP despite distance to TSS.                                                               |
| FHL1_E229_R    | 0.4<br>6            | 0.3<br>4        | 0.0<br>0   | 0.0<br>5      | HC                                           | -                               | 1/9                    | 229                               | -                                                  | -                                      | Shows MeXiP despite distance to TSS and/or presence of a LINE.                                     |
| FHL1_P768_F    | 0.5<br>0            | 0.3<br>9        | 0.0<br>4   | 0.2<br>6      | IC                                           | LINE                            | 1/9                    | -768                              |                                                    |                                        |                                                                                                    |

|                         |          |          |          |          |    |      |     |       |     |         |                                                                                                                                                                                                               |
|-------------------------|----------|----------|----------|----------|----|------|-----|-------|-----|---------|---------------------------------------------------------------------------------------------------------------------------------------------------------------------------------------------------------------|
| FMR1_P484_R             | 0.9<br>7 | 0.6<br>0 | 0.6<br>8 | 0.5<br>7 | IC | -    | 1/9 | -484  | Yes | (5,6,7) | The 2 Illumina assays for FMR1 are discordant and P484 does not match previous methylation results.                                                                                                           |
| FMR1_P62_R              | 0.6<br>9 | 0.0<br>8 | 0.0<br>1 | 0.0<br>1 | HC | -    | 1/9 | -62   |     |         |                                                                                                                                                                                                               |
| G6PD_E190_F             | 0.7<br>4 | 0.1<br>5 | 0.0<br>1 | 0.0<br>4 | HC | -    | 0/5 | -783  | -   | (8, 9)  | Shows MeXiP despite distance to TSS and/or presence of a LINE.                                                                                                                                                |
| G6PD_P1065_R            | 0.8<br>7 | 0.3<br>7 | 0.1<br>3 | 0.0<br>7 | IC | LINE | 0/5 | 472   |     |         |                                                                                                                                                                                                               |
| L1CAM_P19_F             | 0.6<br>2 | 0.5<br>6 | 0.3<br>0 | 0.1<br>8 | IC | -    | -   | -19   | Yes | -       | The 2 Illumina assays for L1CAM are discordant however the other assay is an LC.                                                                                                                              |
| MKRN4_E249_R            | 0.9<br>9 | 0.3<br>1 | 0.9<br>9 | 0.1<br>5 | HC | -    | -   | 249   | Yes | -       | Pseudogene                                                                                                                                                                                                    |
| MKRN4_P1320_R           | 0.9<br>9 | 0.9<br>0 | 0.9<br>9 | 0.9<br>8 | HC | -    | -   | -1320 | Yes |         |                                                                                                                                                                                                               |
| NDP                     | 13%      | 16%      | 6%       | 9%       | IC | -    | -   | -59   | -   | -       | undetermined                                                                                                                                                                                                  |
| PCTK1_E77_R             | 0.7<br>2 | 0.5<br>4 | 0.8<br>1 | 0.6<br>6 | HC | -    | 6/6 | 77    | -   | (10)    | Assay does not match previous methylation results.                                                                                                                                                            |
| PLS3_E70_F <sup>i</sup> | 0.2<br>9 | 0.6<br>1 | 0.1<br>1 | 0.1<br>1 | IC | -    | 5/9 | 70    | -   | (11)    | Previous methylation results only examined methylation in males.                                                                                                                                              |
| PLS3_P94_R              | 0.3<br>0 | 0.4<br>9 | 0.2<br>6 | 0.2<br>0 | IC | -    | 5/9 | -94   |     |         |                                                                                                                                                                                                               |
| SLC6A8_P193_R           | 0.8<br>6 | 0.1<br>7 | 0.8<br>4 | 0.1<br>0 | IC | -    | -   | -193  | Yes | (2)     | The 3 Illumina assays for SLC6A8 are discordant however the other assay is an LC. Previous methylation results only examined methylation in males and there is also has a pseudogene on chr 16 <sup>f</sup> . |
| SLC6A8_seq_28_S227_F    | 0.7<br>3 | 0.6<br>3 | 0.0<br>0 | 0.0<br>9 | HC | -    | -   | -1681 |     |         |                                                                                                                                                                                                               |
| STK23_E182_R            | 0.9<br>9 | 0.7<br>2 | 0.8<br>7 | 0.2<br>6 | HC | -    | -   | 182   | Yes | (2)     | The 2 Illumina assays for STK are discordant and Previous methylation results only examined methylation in males.                                                                                             |
| STK23_P24_F             | 0.8<br>7 | 0.6<br>3 | 0.4<br>5 | 0.2<br>1 | HC | -    | -   | -24   |     |         |                                                                                                                                                                                                               |

|                   |          |          |          |          |    |      |     |      |     |                |                                                                                                                                   |
|-------------------|----------|----------|----------|----------|----|------|-----|------|-----|----------------|-----------------------------------------------------------------------------------------------------------------------------------|
| SYBL1_E23_R       | 0.7<br>5 | 0.2<br>1 | 0.7<br>2 | 0.0<br>7 | HC | -    | 0/5 | 23   | -   | (12,8)         | Silent on both X and Y chromosomes. P349 shows MeXiP despite presence of a LINE.                                                  |
| SYBL1_P349_F      | 0.5<br>0 | 0.1<br>1 | 0.5<br>7 | 0.0<br>1 | IC | LINE | 0/5 | -349 | -   |                |                                                                                                                                   |
| Xist_seq_80_S47_R | 0.8<br>5 | 0.8<br>3 | 0.9<br>7 | 0.9<br>7 | IC | -    | -   | -31  | Yes | (13,14<br>,15) | The 2 Illumina assays for XIST are discordant however the other assay is an LC. Is also expressed only from the Xi <sup>h</sup> . |

- a) Grey shading represents possible features which may interfere with MeXiP.
- b) Three LC assays (CTAG2\_P1426\_F, MAGEC3\_P903\_F, TIMP1\_P615\_R) were also located within repetitive elements
- c) Seven LC assays (CDM\_seq\_21\_S260\_R, CTAG2\_P1426\_F, MAGEA1\_P926\_F, MAGEC3\_E307\_F, MAGEC3\_P903\_F, MCF2\_P1024\_R, TIMP1\_E254\_R) were also beyond 700 bp upstream or 200 bp downstream
- d) Grey shading indicates a gene with multiple Illumina assays which show different methylation patterns. Three genes (BTK, MCF2, TIMP1) had only LC assays and also were discordant between assays within the same gene.
- e) Grey shading indicates that Illumina methylation results conflict with previous methylation results.
- f) Recent genome-wide studies suggest a hypermethylation of pseudogenes and duplicated regions thus it is possible that the presence of a tandem duplication or pseudogene may predispose genes to hypermethylation which may explain the high methylation seen for *BCAP* and *SLC6A8* <sup>(2),(16)</sup>.
- g) Members of cancer-testis (CT) antigen family of genes are often found in palindromic repeats as multicopy genes and pseudogenes and have typically been shown to be highly methylated in all tissues except the germline – a pattern generally found for genes with germline-specific expression <sup>(3),(2),(17)</sup>. Consistent with high levels of methylation in all tissues other than testis, all MAGEs and CTAGs showed hypermethylation in blood and placenta regardless of CpG density emphasizing that gene function as well as CpG density is important in determining methylation status <sup>(3),(2)</sup>.
- h) Both XIST assays on the Illumina GoldenGate panel showed nearly 100% methylation in males however females showed methylation levels up to 95%. While the trend of these methylation levels was as expected the level of methylation in females appears to have been substantially overestimated by the Illumina assay.

## References

1. Kubota, T., Nonoyama, S., Tonoki, H., Masuno, M., Imaizumi, K., Kojima, M., Wakui, K., Shimadzu, M. and Fukushima, Y. (1999) A new assay for the analysis of X-chromosome inactivation based on methylation-specific PCR. *Human Genetics*, **104**, 49-55.
2. Grunau, C., Hindermann, W. and Rosenthal, A. (2000) Large-scale methylation analysis of human genomic DNA reveals tissue-specific differences between the methylation profiles of genes and pseudogenes. *Hum Mol Genet.* , **9**, 2651-63.
3. De Smet, C., Lurquin, C., Lethé, B., Martelange, V. and Boon, T. (1999) DNA Methylation Is the Primary Silencing Mechanism for a Set of Germ Line- and Tumor-Specific Genes with a CpG-Rich Promoter. *Molecular and Cellular Biology*, **19**, 7327–7335.
4. Warburton, P.E., Giordano, J., Cheung, F., Gelfand, Y. and Benson, G. (2004) Inverted repeat structure of the human genome: the X-chromosome contains a preponderance of large, highly homologous inverted repeats that contain testes genes. *Genome Res*, **14**, 1861-9.
5. Panagopoulos, I., Lassen, C., Kristofferson, U. and Aman, P. (1999) A methylation PCR approach for detection of fragile X syndrome. *Hum Mutat.*, **14**, 71-9.
6. Carrel, L. and Willard, H.F. (1996) An assay for X inactivation based on differential methylation at the fragile X locus, FMR1. *Am. J. Med. Genet.*, **64**, 27-30.
7. Hansen, R., Gartler, S., Scott, C., Chen, S.-H. and Laird, C. (1992) Methylation analysis of CGG sites in the CpG island of the human FMR1 gene. *Hum. Mol. Genet.*, **1**, 571-578.
8. Huppke, P., Bohlander, S., Krämer, N., Laccone, F. and Hanefeld, F. (2002) Altered methylation pattern of the G6 PD promoter in Rett syndrome. *Neuropediatrics*, **33**, 105-8.
9. Wolf, S.F., Dintzis, S., Toniolo, D., Persico, G., Lunnen, K.D., Axelman, J. and Migeon, B.R. (1984) Complete concordance between glucose -6- phosphate dehydrogenase activity and hypomethylation of 3' CpG clusters: implications for X chromosome dosage compensation. *Nucl. Acids Res.*, **12**, 9333-9348.
10. Carrel, L., Clemson, C.M., Dunn, J.M., Miller, A.P., Hunt, P.A., Lawrence, J.B. and Willard, H.F. (1996) X inactivation analysis and DNA methylation studies of the ubiquitin activating enzyme E1 and PCTAIRE-1 genes in human and mouse. *Hum. Mol. Genet.*, **5**, 391-402.
11. Oprea, G.E., Kröber, S., McWhorter, M.L., Rossoll, W., Müller, S., Krawczak, M., Bassell, G.J., Beattie, C.E. and Wirth, B. (2008) Plastin 3 is a protective modifier of autosomal recessive spinal muscular atrophy. *Science*, **320**, 524-7.

12. Huber, R., Hansen, R.S., Strazzullo, M., Pengue, G., Mazzarella, R., D'Urso, M., Schlessinger, D., Pilia, G., Gartler, S.M. and D'Esposito, M. (1999) DNA methylation in transcriptional repression of two differentially expressed X-linked genes, GPC3 and SYBL1. *Proc Natl Acad Sci U S A*, **96**, 616-21.
13. Vasques, L.R., Stabellini, R., Xue, F., Tian, X.C., Soukoyan, M. and Pereira, L.V. (2005) XIST repression in the absence of DNMT1 and DNMT3B. *DNA Res*, **12**, 373-8.
14. Song, M.A., Park, J.H., Jeong, K.S., Park, D.S., Kang, M.S. and Lee, S. (2007) Quantification of CpG methylation at the 5'-region of XIST by pyrosequencing from human serum. *Electrophoresis*, **28**, 2379-84.
15. Hendrich, B.D., Brown, C.J. and Willard, H.F. (1993) Evolutionary conservation of possible functional domains of the human and murine XIST genes. *Hum. Mol. Genet.*, **2**, 663-672.
16. Rauch, T.A., Wu, X., Zhong, X., Riggs, A.D. and Pfeifer, G.P. (2009) A human B cell methylome at 100-base pair resolution. *PNAS*, **106**, 671:8.
17. Weber, M., Hellmann, I., Stadler, M.B., Ramos, L., Paabo, S., Rebhan, M. and Schubeler, D. (2007) Distribution, silencing potential and evolutionary impact of promoter DNA methylation in the human genome. *Nat Genet*, **39**, 457-66.
